# Supplementary material for: Development of a Polyherbal Topical Gel for the Treatment of Acne
Source: MDPI journal article supplement (doi:10.3390/gels9020163), 2023-02-17
Supplement: s1 [file s1]

Article

# Development of a Polyherbal Topical Gel for the Treatment of Acne

Benedict Jose Chellathurai <sup>1,\*</sup>, Ramyadevi Anburose <sup>1</sup>, Mohammad H. Alyami <sup>2,\*</sup>, Mohan Sellappan <sup>1</sup>, Mohammad F. Bayan <sup>3</sup>, Balakumar Chandrasekaran <sup>3</sup>, Kumarappan Chidambaram <sup>4</sup> and Mohamed Rahamathulla <sup>5</sup>

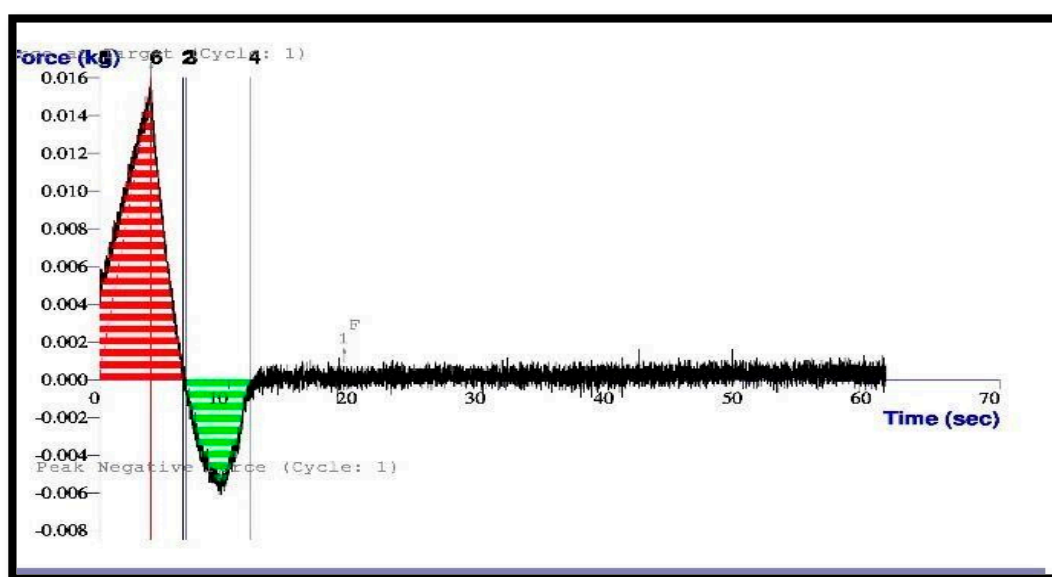

Figure S1. Graphical representation of gel strength.

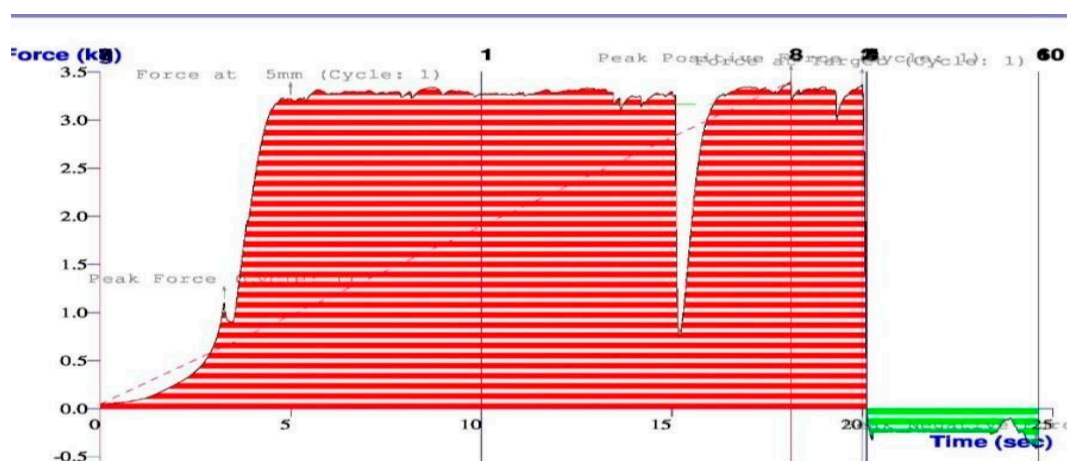

Figure S2. Graphical representation of extrudability.
